# Supplementary material for: Identification of volume overload hospitalizations among hemodialysis patients using administrative claims: a validation study
Source: PubMed Central journal article supplement (PMC5105303; doi:10.1186/s12882-016-0384-6), 2016-11-11
Supplement: 12882_2016_384_MOESM1_ESM.pdf [file 12882_2016_384_MOESM1_ESM.pdf]

|                  |  |
|------------------|--|
| Patient_SK       |  |
| Admission Date   |  |
| Abstracter Name  |  |
| Abstraction Date |  |

|              |
|--------------|
| <u>Notes</u> |
|--------------|

**Respiratory Compromise**

| Symptom/ Finding                   | Y | N | Qualitative                                                                                                                                           | Date and Time | Chart location/ source                                                                                                                                             |
|------------------------------------|---|---|-------------------------------------------------------------------------------------------------------------------------------------------------------|---------------|--------------------------------------------------------------------------------------------------------------------------------------------------------------------|
| Subjective dyspnea                 |   |   |                                                                                                                                                       |               |                                                                                                                                                                    |
| Instructions                       |   |   | List how dyspnea was described. Examples: "patient presented with shortness of breath"; "patient reports worsening breathing over last 4 hours", etc. |               | ED provider note; Admitting team admission note; Nephrology consult note; Cardiology consult note <b>[must be within 24h of adm]</b>                               |
| Presenting O <sub>2</sub> sat <92% |   |   |                                                                                                                                                       |               |                                                                                                                                                                    |
| Instructions                       |   |   | List saturation value (even if above 92%), Ex. 91%, 100%                                                                                              |               | ED provider note; Admitting team admission note; Nephrology consult note; Cardiology consult note <b>[must be within 24h of adm; select first available value]</b> |

**Physical Exam/ Clinical Findings of Volume Overload**

| Finding                     | Y | N | Qualitative      | Date and Time | Chart location/ source                                                                                                               |
|-----------------------------|---|---|------------------|---------------|--------------------------------------------------------------------------------------------------------------------------------------|
| Bibasilar lung rales        |   |   |                  |               |                                                                                                                                      |
| Instructions                |   |   | List description |               | ED provider note; Admitting team admission note; Nephrology consult note; Cardiology consult note <b>[must be within 24h of adm]</b> |
| 3 <sup>rd</sup> heart sound |   |   |                  |               |                                                                                                                                      |
| Instructions                |   |   | List description |               | ED provider note; Admitting team admission note; Nephrology consult note; Cardiology consult note <b>[must be within 24h of adm]</b> |
| Jugular vein distension     |   |   |                  |               |                                                                                                                                      |
| Instructions                |   |   | List description |               | ED provider note; Admitting team admission note; Nephrology consult note; Cardiology consult note <b>[must be within 24h of adm]</b> |

| MD Diagnosis                                                        | Y | N | Qualitative                                                                                   | Date and Time | Chart location/ source                                                                                                               |
|---------------------------------------------------------------------|---|---|-----------------------------------------------------------------------------------------------|---------------|--------------------------------------------------------------------------------------------------------------------------------------|
| Diagnosis of heart failure or fluid overload in impression and plan |   |   |                                                                                               |               |                                                                                                                                      |
| Instructions                                                        |   |   | List qualitative description and where mentioned in note- listed in impression, in plan, etc. |               | ED provider note; Admitting team admission note; Nephrology consult note; Cardiology consult note <b>[must be within 24h of adm]</b> |

### Imaging Findings of Volume Overload

| Finding                            | Y | N | Qualitative                                                                                                                       | Date and Time                                                                                                                                                                                                                                   | Chart location/ source |
|------------------------------------|---|---|-----------------------------------------------------------------------------------------------------------------------------------|-------------------------------------------------------------------------------------------------------------------------------------------------------------------------------------------------------------------------------------------------|------------------------|
| Interstitial edema                 |   |   |                                                                                                                                   |                                                                                                                                                                                                                                                 | <b>Indication:</b>     |
| Instructions                       |   |   | If XR- note if portable; Fluid-related impression, ex: "worsening perihilar opacities which may reflect worsening edema"          | Chest imaging: CXR or CT; Abdominal imaging: AXR or CT <b>[must be within 24h of adm]</b>                                                                                                                                                       |                        |
| Bilateral infiltrate without fever |   |   |                                                                                                                                   |                                                                                                                                                                                                                                                 | <b>Indication:</b>     |
| Instructions                       |   |   | If XR- note if portable; Fluid-related impression if not listed above; List temperature value (38.2 or 100.4)                     | Chest imaging: CXR or CT; Abdominal imaging: AXR or CT; Temperature in ED provider note; Admitting team admission note; Nephrology consult note; Cardiology consult note <b>[must be within 24h of adm; select 1st available value of temp]</b> |                        |
| Pleural effusion                   |   |   |                                                                                                                                   |                                                                                                                                                                                                                                                 | <b>Indication:</b>     |
| Instructions                       |   |   | If XR- note if portable; List size, descriptors, Ex: "unchanged blunting of bilat costophrenic angles, stable bilat pl effusions" | Chest imaging: CXR or CT; Abdominal imaging: AXR or CT <b>[must be within 24h of adm; select 1st available value]</b>                                                                                                                           |                        |
| Abdominal ascites                  |   |   |                                                                                                                                   |                                                                                                                                                                                                                                                 | <b>Indication:</b>     |
| Instructions                       |   |   | If XR- note if portable List amount/ size                                                                                         | Abdominal imaging: AXR or CT; <b>**NOT an exam finding of ascites [must be within 24h of adm]</b>                                                                                                                                               |                        |
| CVP >12 mmHg                       |   |   |                                                                                                                                   |                                                                                                                                                                                                                                                 |                        |
| Instructions                       |   |   | List value                                                                                                                        | Transducer from a central venous catheter- ED provider note; Admitting team admission note; Nephrology consult note; Cardiology consult note <b>[must be within 24h of adm]</b>                                                                 |                        |
| PCWP >12 mmHg                      |   |   |                                                                                                                                   |                                                                                                                                                                                                                                                 |                        |
| Instructions                       |   |   | List value                                                                                                                        | Swan-Ganz catheter- ED provider note; Admitting team admission note; Nephrology consult note; Cardiology consult note <b>[must be within 24h of adm]</b>                                                                                        |                        |

\*\*If multiple imaging types per patient within first 24 hours, review all and record data from exam with most detailed pulmonary imaging/ reporting

### Echocardiograms

|                                      | Y | N | Indication/ type                      | EF  | IVC                                 | CVP                  | Effusion                             | Change                                                                                                                                         | Date and Time                                                                  |
|--------------------------------------|---|---|---------------------------------------|-----|-------------------------------------|----------------------|--------------------------------------|------------------------------------------------------------------------------------------------------------------------------------------------|--------------------------------------------------------------------------------|
| TTE/ TEE this admission              |   |   |                                       |     |                                     |                      |                                      |                                                                                                                                                |                                                                                |
| Most recent prior TTE/ TEE in system |   |   |                                       |     |                                     |                      |                                      |                                                                                                                                                |                                                                                |
| Instructions                         |   |   | List indication if given; TTE vs. TEE | (%) | Dilated? Phasic respiratory change? | Estimated CVP (mmHg) | Pericardial effusion (yes/ no); size | Change from prior TTE/ TEE?- any noted change but look for change in EF or change in valve function or presence of vegetation (specify change) | Does <b>NOT</b> have to be within 24h of admission. If >1, use first available |
